# Supplementary material for: Linking prediction models to government ordinances to support hospital operations during the COVID-19 pandemic
Source: HighWire-hosted journal article supplement (doi:10.1136/bmjhci-2020-100248), 2021-05-01
Supplement: bmjhci-2020-100248supp001_data_supplement.pdf [file bmjhci-2020-100248supp001_data_supplement.pdf]

## Appendix

**External Model Inputs and Assumptions:** In order to run the publicly published models, Beyond Limits and CHIME, with data from UMHC, several inputs and assumptions were made. For the CHIME model, the hospital parameters were set as follows: A regional population of Florida as 21.48 million. Spread and contact parameters were set with a doubling time of 3.4 days along with a social distancing implementation date of June 10, 2020, with a reduction of 30%. Severity parameters were based on UMHC historical trends at run date. For the Beyond Limits model, the assumptions were as follows: A regional population of Florida as 21.48 million, where hospital market share equated to 0.7%, based on infections. Regional mobility was set at 70% for each of the run dates. The estimated number of infected people per positive test was set at 70. All other inputs were based on UMHC historical trends at run date.
